# Supplementary material for: GATA6 regulates WNT and BMP programs to pattern precardiac mesoderm during the earliest stages of human cardiogenesis
Source: eLife. 2025 Mar 13;13:RP100797. doi: 10.7554/eLife.100797 (PMC11906159; doi:10.7554/eLife.100797)
Supplement: Figure 1—figure supplement 1—source data 2. [file elife-100797-fig1-figsupp1-data2.xlsx]

## Sheet: Sheet1
Figure 1-figure supplement 1 - Source Data 2
Figure 1-figure supplement 1H: cardiac troponin T (cTnT) flow cytometry
Figure 1-figure supplement 1H statistics
GraphPad Prism 10 Summary statistics: two-tailed T-test
Column B	1071delG/+ a4
vs.	vs.
Column A	corr/+ b2
Unpaired t test
P value	0.0022
P value summary	**
Significantly different (P < 0.05)?	Yes
One- or two-tailed P value?	Two-tailed
t, df	t=3.877, df=12
How big is the difference?
Mean of column A	74.16
Mean of column B	32.16
Difference between means (B - A) ± SEM	-42.00 ± 10.83
95% confidence interval	-65.60 to -18.39
R squared (eta squared)	0.556
Figure 1-figure supplement 1H Replicate values. Numbers indicate %cTnT from individual experimental runs.
corr/+ b2	1071delG/+ a4
91.439	30.375
88.325	59.82
83.477	73.204
61.6	20.773
58.2	24.1
74.487	8.168
61.6	8.7
