# Supplementary material for: GATA6 regulates WNT and BMP programs to pattern precardiac mesoderm during the earliest stages of human cardiogenesis
Source: eLife. 2025 Mar 13;13:RP100797. doi: 10.7554/eLife.100797 (PMC11906159; doi:10.7554/eLife.100797)
Supplement: Figure 1—figure supplement 2—source data 1. [file elife-100797-fig1-figsupp2-data1.xlsx]

## Sheet: Sheet1
Figure 1-figure supplement 2 - Source Data 1
Figure 1-figure supplement 2A, K: RT-qPCR
Figure 1-figure supplement 2A
Numbers indicate individual 2^(–∆∆Ct) values (average from technical triplicates) normalized to +/+ D2 samples.
NKX2.5				GATA6
	+/+ w4	+/- m2	-/- m11		+/+ w4	+/- m2	-/- m11
D0	0	0	0	D0	2e-05	0	1e-05
D2	1	0.7797	1.542	D2	1	0.2951	0.073
D3	0.7375	0.2781	0.6083	D3	0.1554	0.1446	0.0221
D4	2.544	1.709	0.712	D4	0.1702	0.0656	0.0297
D5	10.45	3.994	1.161	D5	1.168	0.3647	0.0487
D6	44.56	6.073	4.233	D6	0.7647	0.5956	0.1112
D8	133.8	11.02	0.9592	D8	0.366	0.2215	0.0406
D11	168.3	53.83	4.891	D11	0.8158	0.4698	0.0764
TBX20				GATA4
	+/+ w4	+/- m2	-/- m11		+/+ w4	+/- m2	-/- m11
D0	0.04	0.04	0.04	D0	0.009	0.006	0.005
D2	1	0.5959	1.08	D2	1	0.607	0.651
D3	6.341	2.87	1.217	D3	0.786	0.799	0.564
D4	30.07	4.991	2.112	D4	0.703	0.671	0.418
D5	100.2	37.99	2.304	D5	3.84	1.802	0.39
D6	48.58	35.76	4.794	D6	4.269	2.927	1.04
D8	163.3	26.23	5.204	D8	6.287	1.406	0.392
D11	309.8	139.5	10.52	D11	8.023	5.66	1.055
TBX5				MEF2C
	+/+ w4	+/- m2	-/- m11		+/+ w4	+/- m2	-/- m11
D0	0.7024	0.7927	1.305	D0	1.09	1.346	1.38
D2	1	1.582	1.069	D2	1	1.011	1.007
D3	0.7307	0	0	D3	0.4866	0.4609	0.4635
D4	123.4	6.958	16.3	D4	26.37	0.9138	1.702
D5	3715	1270	36.82	D5	244	34.33	9.557
D6	4402	1793	22.24	D6	622.8	194.5	71.82
D8	7102	387.7	3.843	D8	1285	274.4	49.37
D11	20400	3496	0	D11	843.1	854.1	134.3
Figure 1-figure supplement 2F
Numbers indicate individual 2^(–∆∆Ct) values (average from technical triplicates) normalized to +/+ D2 samples.
ALDH1A2
	+/+ w4	+/- m2	-/- m11
D0	0.219	0.1695	0.1361
D2	1	0.9988	1.282
D3	5.138	2.312	13.3
D4	87.66	19.88	219.3
D5	40.4	108.4	207
D6	15.39	64.71	160
D8	3.599	6.774	4.625
D11	8.528	1.235	3.956
