# Supplementary material for: GATA6 regulates WNT and BMP programs to pattern precardiac mesoderm during the earliest stages of human cardiogenesis
Source: eLife. 2025 Mar 13;13:RP100797. doi: 10.7554/eLife.100797 (PMC11906159; doi:10.7554/eLife.100797)
Supplement: Figure 1—source data 1. [file elife-100797-fig1-data1.xlsx]

## Sheet: Sheet1
Figure 1 - Source Data 1
Figure 1C: cardiac troponin T (cTnT) flow cytometry
Figure 1C statistics
GraphPad Prism 10 Summary statistics: Multiple comparisons between Genotypes				2-way ANOVA
Compare row means (main row effect)
Number of families	1
Number of comparisons per family	3
Alpha	0.05
Tukey's multiple comparisons test	Predicted (LS) mean diff.	95.00% CI of diff.	Below threshold?	Summary	Adjusted P Value
+/+ vs. +/-	29.1	17.53 to 40.67	Yes	****	<0.0001
+/+ vs. -/-	53.82	41.96 to 65.68	Yes	****	<0.0001
+/- vs. -/-	24.72	12.86 to 36.57	Yes	****	<0.0001
GraphPad Prism 10 Summary statistics: Multiple comparisons between all clonal lines				2-way ANOVA
Group A indicates: +/+ w4, +/- m2, -/- m11		w2, 24, m2, m5, m11, m14 indicate H1-GATA6--hESC clonal lines
Group B indicates: +/+ w2, +/- m5, -/- m14
Compare cell means regardless of rows and columns
Number of families	1
Number of comparisons per family	15
Alpha	0.05
Tukey's multiple comparisons test	Predicted (LS) mean diff.	95.00% CI of diff.	Below threshold?	Summary	Adjusted P Value
+/+:Group A vs. +/+:Group B	1.816	-18.25 to 21.88	No	ns	0.9998
+/+:Group A vs. +/-:Group A	34.52	15.48 to 53.56	Yes	****	<0.0001
+/+:Group A vs. +/-:Group B	25.5	5.433 to 45.57	Yes	**	0.0055
+/+:Group A vs. -/-:Group A	54.83	34.76 to 74.89	Yes	****	<0.0001
+/+:Group A vs. -/-:Group B	54.63	34.56 to 74.69	Yes	****	<0.0001
+/+:Group B vs. +/-:Group A	32.71	12.64 to 52.77	Yes	***	0.0002
+/+:Group B vs. +/-:Group B	23.68	2.638 to 44.73	Yes	*	0.0189
+/+:Group B vs. -/-:Group A	53.01	31.97 to 74.06	Yes	****	<0.0001
+/+:Group B vs. -/-:Group B	52.81	31.77 to 73.86	Yes	****	<0.0001
+/-:Group A vs. +/-:Group B	-9.022	-29.09 to 11.04	No	ns	0.7671
+/-:Group A vs. -/-:Group A	20.31	0.2391 to 40.37	Yes	*	0.0458
+/-:Group A vs. -/-:Group B	20.11	0.03984 to 40.17	Yes	*	0.0493
+/-:Group B vs. -/-:Group A	29.33	8.282 to 50.37	Yes	**	0.0018
+/-:Group B vs. -/-:Group B	29.13	8.082 to 50.17	Yes	**	0.002
-/-:Group A vs. -/-:Group B	-0.1992	-21.25 to 20.85	No	ns	>0.9999
Figure 1C Replicate values. Numbers indicate %cTnT from individual experimental runs.
Genotype	Group A											Group B
+/+	50.75	53.6667	61.21	87.2663	63.973	38.365	51.232	70.132	46.295	37.53	45.32	50.1227	80.296	63.9425	38.365	38.995	44.525	72.931	57.027	33.06
+/-	28.9	18.85	15.227	58.1053	39.423	3.63	18.245	11.404	7.53	4.44	20.25	61.738	46.782	40.7525	3.63	14.69	15.355	66.417	11.256	5.49
-/-	0.6		0.015		0.94	0.005	0.08	0.04	0.445	0	0.035	0.526	0.47	1.28	0.005	0.075	0.025	0.072	1.455	0.045
