# Supplementary material for: GATA6 regulates WNT and BMP programs to pattern precardiac mesoderm during the earliest stages of human cardiogenesis
Source: eLife. 2025 Mar 13;13:RP100797. doi: 10.7554/eLife.100797 (PMC11906159; doi:10.7554/eLife.100797)
Supplement: Figure 1—source data 2. [file elife-100797-fig1-data2.xlsx]

## Sheet: Sheet1
Figure 1 - Source Data 2
Figure 1D,E: RT-qPCR
GraphPad Prism 10 Summary Statistics: one-way ANOVA with Tukey's multiple comparisons test
NKX2.5
Tukey's multiple comparisons test	Mean Diff.	95.00% CI of diff.	Below threshold?	Summary	Adjusted P Value
+/+ vs. +/-	0.6664	0.2452 to 1.088	Yes	**	0.0022
+/+ vs. -/-	0.8349	0.4303 to 1.240	Yes	***	0.0002
+/- vs. -/-	0.1685	-0.2527 to 0.5897	No	ns	0.5709
TBX5
Tukey's multiple comparisons test	Mean Diff.	95.00% CI of diff.	Below threshold?	Summary	Adjusted P Value
+/+ vs. +/-	0.7397	0.1328 to 1.347	Yes	*	0.0158
+/+ vs. -/-	0.8828	0.2759 to 1.490	Yes	**	0.0043
+/- vs. -/-	0.143	-0.4638 to 0.7499	No	ns	0.8211
TBX20
Tukey's multiple comparisons test	Mean Diff.	95.00% CI of diff.	Below threshold?	Summary	Adjusted P Value
+/+ vs. +/-	0.6774	0.1500 to 1.205	Yes	*	0.0111
+/+ vs. -/-	0.9694	0.4419 to 1.497	Yes	***	0.0005
+/- vs. -/-	0.292	-0.2354 to 0.8194	No	ns	0.3555
GATA4
Tukey's multiple comparisons test	Mean Diff.	95.00% CI of diff.	Below threshold?	Summary	Adjusted P Value
+/+ vs. +/-	0.4468	0.05791 to 0.8357	Yes	*	0.023
+/+ vs. -/-	0.6978	0.3089 to 1.087	Yes	***	0.0006
+/- vs. -/-	0.251	-0.1379 to 0.6399	No	ns	0.2524
ISL1
Tukey's multiple comparisons test	Mean Diff.	95.00% CI of diff.	Below threshold?	Summary	Adjusted P Value
+/+ vs. +/-	0.4594	0.09979 to 0.8191	Yes	*	0.0115
+/+ vs. -/-	0.5919	0.2322 to 0.9515	Yes	**	0.0015
+/- vs. -/-	0.1324	-0.2272 to 0.4921	No	ns	0.6229
HAND1
Tukey's multiple comparisons test	Mean Diff.	95.00% CI of diff.	Below threshold?	Summary	Adjusted P Value
+/+ vs. +/-	-0.01336	-0.5834 to 0.5567	No	ns	0.998
+/+ vs. -/-	0.6789	0.1088 to 1.249	Yes	*	0.0191
+/- vs. -/-	0.6922	0.1222 to 1.262	Yes	*	0.017
SMARCD3
Tukey's multiple comparisons test	Mean Diff.	95.00% CI of diff.	Below threshold?	Summary	Adjusted P Value
+/+ vs. +/-	0.3762	0.09604 to 0.6564	Yes	**	0.0087
+/+ vs. -/-	0.5975	0.3173 to 0.8777	Yes	***	0.0002
+/- vs. -/-	0.2213	-0.05892 to 0.5015	No	ns	0.1342
Replicate Values: Individual 2^(–∆∆Ct) values (average from technical triplicates) normalized to the average value for +/+ samples
NKX2.5
+/+	+/-	-/-
0.357056	0.125032	0.100594
1.56401	0.14396	0.269614
1.16412	0.158622	0.110547
1.15612	0.357322	0.328708
0.474001	0.522965	0.128764
1.29297	0.693584	0.0511857
0.991723		0.165998
TBX5
+/+	+/-	-/-
0.500417	0.249579	0.0547542
2.27046	0.14961	0.0414974
0.157617	0.0641677	0.00079609
0.777333	0.262962	0.204056
0.637903	0.186898	0.358813
1.70313	0.664325	0.0894116
0.953136	0.244432	0.0713966
TBX20
+/+	+/-	-/-
0.69588	0.255205	0.0224146
1.97042	0.470152	0.0760671
0.224195	0.165043	0.0221228
0.514368	0.184035	0.00971364
0.680053	0.0956526	0.0283743
1.42737	0.734952	0.0408131
1.48771	0.353183	0.0148623
GATA4
+/+	+/-	-/-
0.653057	0.40711	0.198197
1.51048	0.353018	0.345217
0.876972	0.601193	0.213628
0.674917	0.491293	0.28238
0.697377	0.254862	0.410282
1.55849	1.12643	0.454945
1.02871	0.638483	0.21097
ISL1
+/+	+/-	-/-
1.07331	0.4376	0.413571
1.09654	0.289686	0.576703
1.12537	0.768937	0.824205
0.757724	0.529178	0.18564
0.493134	0.126207	0.200351
1.10348	0.737699	0.364711
1.35045	0.894691	0.291822
HAND1
+/+	+/-	-/-
1.10242	1.35647	0.560275
0.716481	0.554979	0.176225
1.63118	1.38251	0.513862
0.765587	1.23349	0.279913
0.7286	0.157642	0.133044
1.05573	1.39508	0.263574
SMARCD3
+/+	+/-	-/-
1.31648	0.48755	0.540468
0.816886	0.59801	0.318419
0.794837	0.488142	0.403012
1.01963	0.926055	0.391288
1.19279	0.879806	0.401237
0.859371	0.363001	0.360473
