# Supplementary material for: GATA6 regulates WNT and BMP programs to pattern precardiac mesoderm during the earliest stages of human cardiogenesis
Source: eLife. 2025 Mar 13;13:RP100797. doi: 10.7554/eLife.100797 (PMC11906159; doi:10.7554/eLife.100797)
Supplement: Figure 2—figure supplement 1—source data 1. [file elife-100797-fig2-figsupp1-data1.xlsx]

## Sheet: KP flow
Figure 2-figure supplement 1 - Source Data 1
Figure 2-figure supplement 1B: KDR / PDGFRa flow cytometry
K= KDR, P = PDGFRa
Figure 2-figure supplement 1B statistics
GraphPad Prism 10 Summary statistics			one-way ANOVA
K+P+ double positive
Holm-Šídák's multiple comparisons test	Mean Diff.	Below threshold?	Summary	Adjusted P Value
+/+ vs. +/-	11.38	Yes	*	0.0417
+/+ vs. -/-	20.25	Yes	*	0.0411
K+
Holm-Šídák's multiple comparisons test	Mean Diff.	Below threshold?	Summary	Adjusted P Value
+/+ vs. +/-	9.4	Yes	*	0.0189
+/+ vs. -/-	22.6	Yes	*	0.0137
P+
Holm-Šídák's multiple comparisons test	Mean Diff.	Below threshold?	Summary	Adjusted P Value
+/+ vs. +/-	6.55	No	ns	0.3869
+/+ vs. -/-	3.35	No	ns	0.5575
Figure 2-figure supplement 1B Replicates: each number indicates %K+P+, %K+, or %P+ (as indicated) from an individual experiment
K+P+
+/+	+/-	-/-
76.9	56.7	30.5
51.3	32.1	30.5
55	44.7	33.9
28.5	28.5	24.9
41.8	21.4	20.4
37.1	38.9	28.9
K+
+/+	+/-	-/-
87.5	79.1	47.5
56.1	44.8	39.4
69.2	60.2	43.7
48.8	49	46.2
61.7	41.1	39.5
67	59.7	38.4
P+
+/+	+/-	-/-
85.3	72.4	74.8
63	43.8	46
75.1	70.3	74
35.2	38.3	36
47.2	31.8	35.4
52.6	62.5	72.1
