# Supplementary material for: GATA6 regulates WNT and BMP programs to pattern precardiac mesoderm during the earliest stages of human cardiogenesis
Source: eLife. 2025 Mar 13;13:RP100797. doi: 10.7554/eLife.100797 (PMC11906159; doi:10.7554/eLife.100797)
Supplement: Figure 2—source data 2. — First tab includes KP flow cytometry in panels B, C and E. Second tab includes BRACHYURY flow cytometry in panel G. [file elife-100797-fig2-data2.xlsx]

## Sheet: Figure 2B 2C 2E  KP flow
Figure 2 - Source Data 2
Figure 2B, C, E: KDR / PDGFRa flow cytometry
K= KDR, P = PDGFRa
Figure 2B statistics
GraphPad Prism 10 Summary statistics: Tukey's Multiple comparisons test				2-way ANOVA
K+P+ double positive
Tukey's multiple comparisons test	Predicted (LS) mean diff.	95.00% CI of diff.	Below threshold?	Summary	Adjusted P Value
D3
+/+ vs. +/-	-2.987	-21.89 to 15.92	No	ns	0.9229
+/+ vs. -/-	-5.267	-23.29 to 12.76	No	ns	0.761
+/- vs. -/-	-2.28	-21.19 to 16.63	No	ns	0.9543
D4
+/+ vs. +/-	9.621	-7.749 to 26.99	No	ns	0.3809
+/+ vs. -/-	18.44	1.753 to 35.13	Yes	*	0.0272
+/- vs. -/-	8.821	-8.549 to 26.19	No	ns	0.443
D5
+/+ vs. +/-	-3.986	-20.68 to 12.70	No	ns	0.8329
+/+ vs. -/-	47.19	30.50 to 63.88	Yes	****	<0.0001
+/- vs. -/-	51.17	34.48 to 67.86	Yes	****	<0.0001
Figure 2C statistics
GraphPad Prism 10 Summary statistics: Tukey's Multiple comparisons test				one-way ANOVA
K+P+ double positive
Tukey's multiple comparisons test	Mean Diff.	95.00% CI of diff.	Below threshold?	Summary	Adjusted P Value
+/+ vs. +/-	-3.986	-19.11 to 11.13	No	ns	0.782
+/+ vs. -/-	47.19	32.07 to 62.31	Yes	****	<0.0001
+/- vs. -/-	51.17	36.05 to 66.29	Yes	****	<0.0001
Figure 2E statistics
GraphPad Prism 10 Summary statistics: Tukey's Multiple comparisons test				one-way ANOVA
K+
Tukey's multiple comparisons test	Mean Diff.	95.00% CI of diff.	Below threshold?	Summary	Adjusted P Value
+/+ vs. +/-	0.02857	-22.60 to 22.66	No	ns	>0.9999
+/+ vs. -/-	48.69	26.06 to 71.32	Yes	****	<0.0001
+/- vs. -/-	48.66	26.03 to 71.29	Yes	****	<0.0001
P+
Tukey's multiple comparisons test	Mean Diff.	95.00% CI of diff.	Below threshold?	Summary	Adjusted P Value
+/+ vs. +/-	-5.314	-35.40 to 24.77	No	ns	0.8946
+/+ vs. -/-	5.529	-24.55 to 35.61	No	ns	0.8865
+/- vs. -/-	10.84	-19.24 to 40.92	No	ns	0.6351
Figure 2B Replicates: each number indicates %K+P+ from an individual experiment
K+P+
	+/+							+/-							-/-
D3	60.8	36.2	54.1	51.3	33.5	23.5		36.8	27.1	79.5	53.5	34.2			53.1	39.8	70.6	46.2	40.4	40.9
D4	76.9	51.3	55	28.5	41.8	36.1	37.1	56.7	32.1	44.7	28.5	21.4	38.9		30.5	30.5	33.9	24.9	20.4	28.5	28.9
D5	68.1	56.1	74	87.4	65.9	72.9	60.7	77.1	50.1	76	87.9	82	79.2	60.7	34.9	20.7	21.3	10.1	26	31.3	10.5
Figure 2C Replicates: each number indicates %K+P+ from an individual experiment
K+P+
+/+	+/-	-/-
68.1	77.1	34.9
56.1	50.1	20.7
74	76	21.3
87.4	87.9	10.1
65.9	82	26
72.9	79.2	31.3
60.7	60.7	10.5
Figure 2E Replicates: each number indicates %K+ or %P+ (as indicated) from an individual experiment
K+
+/+	+/-	-/-
94	94.4	52
86.2	92.1	90
89.3	88.3	42.2
83.5	80.5	9.6
92.7	87.2	31.4
91	96.6	38.7
79.3	76.7	11.3
P+
+/+	+/-	-/-
56.3	70.4	38.2
37.5	30.4	13.3
61.8	66.4	52.3
94	97.8	95.3
59.4	80.5	67
54.2	57	57.6
75.6	73.5	76.4

## Sheet: Figure 2G BRACHYURY flow
Figure 2 - Source Data 2
Figure 2G: BRACHYURY flow cytometry
Figure 2G statistics
GraphPad Prism 10 Summary statistics: Tukey's Multiple comparisons test						2-way ANOVA
Tukey's multiple comparisons test	Mean Diff.	95.00% CI of diff.	Below threshold?	Summary	Adjusted P Value
+/+:D2 vs. +/+:D3	11.74	-7.919 to 31.39	No	ns	0.4345
+/+:D2 vs. +/-:D2	-0.709	-20.37 to 18.95	No	ns	>0.9999
+/+:D2 vs. +/-:D3	5.661	-14.00 to 25.32	No	ns	0.9375
+/+:D2 vs. -/-:D2	-1.005	-20.66 to 18.65	No	ns	>0.9999
+/+:D2 vs. -/-:D3	6.346	-13.31 to 26.00	No	ns	0.9031
+/+:D3 vs. +/-:D2	-12.45	-32.10 to 7.210	No	ns	0.3735
+/+:D3 vs. +/-:D3	-6.077	-25.73 to 13.58	No	ns	0.9177
+/+:D3 vs. -/-:D2	-12.74	-32.40 to 6.914	No	ns	0.3495
+/+:D3 vs. -/-:D3	-5.391	-25.05 to 14.27	No	ns	0.9486
+/-:D2 vs. +/-:D3	6.369	-13.29 to 26.03	No	ns	0.9017
+/-:D2 vs. -/-:D2	-0.2963	-19.95 to 19.36	No	ns	>0.9999
+/-:D2 vs. -/-:D3	7.055	-12.60 to 26.71	No	ns	0.858
+/-:D3 vs. -/-:D2	-6.666	-26.32 to 12.99	No	ns	0.8839
+/-:D3 vs. -/-:D3	0.6855	-18.97 to 20.34	No	ns	>0.9999
-/-:D2 vs. -/-:D3	7.351	-12.31 to 27.01	No	ns	0.8366
Figure 2G Replicates: each number indicates %BRACHYURY+ from an individual experiment
	D2				D3
+/+	86.362	94.82	87.037	71.73	61.435	74.225	79.708	77.632
+/-	78.392	91.073	90.272	83.048	64.639	81.415	86.038	85.215
-/-	81.59	87.85	89.261	85.269	60.547	81.37	85.952	86.696
