# Supplementary material for: GATA6 regulates WNT and BMP programs to pattern precardiac mesoderm during the earliest stages of human cardiogenesis
Source: eLife. 2025 Mar 13;13:RP100797. doi: 10.7554/eLife.100797 (PMC11906159; doi:10.7554/eLife.100797)
Supplement: Figure 2—source data 3. [file elife-100797-fig2-data3.xlsx]

## Sheet: Sheet1
Figure 2 - Source Data 3
Figure 2H: RT-qPCR
GraphPad Prism 10 Summary Statistics: one-way ANOVA with Tukey's multiple comparisons test
T
Tukey's multiple comparisons test	Mean Diff.	95.00% CI of diff.	Below threshold?	Summary	Adjusted P Value
+/+ vs. +/-	0.1287	-0.3595 to 0.6169	No	ns	0.7758
+/+ vs. -/-	-0.2071	-0.6953 to 0.2810	No	ns	0.5274
+/- vs. -/-	-0.3358	-0.8240 to 0.1524	No	ns	0.2075
EOMES
Tukey's multiple comparisons test	Mean Diff.	95.00% CI of diff.	Below threshold?	Summary	Adjusted P Value
+/+ vs. +/-	0.1498	-0.1581 to 0.4576	No	ns	0.4362
+/+ vs. -/-	0.1736	-0.1342 to 0.4814	No	ns	0.3349
+/- vs. -/-	0.02384	-0.2840 to 0.3317	No	ns	0.978
MESP1
Tukey's multiple comparisons test	Mean Diff.	95.00% CI of diff.	Below threshold?	Summary	Adjusted P Value
+/+ vs. +/-	0.1993	-0.07667 to 0.4752	No	ns	0.1799
+/+ vs. -/-	0.01586	-0.2601 to 0.2918	No	ns	0.9878
+/- vs. -/-	-0.1834	-0.4593 to 0.09252	No	ns	0.228
MESP2
Tukey's multiple comparisons test	Mean Diff.	95.00% CI of diff.	Below threshold?	Summary	Adjusted P Value
+/+ vs. +/-	0.04255	-0.6812 to 0.7663	No	ns	0.9872
+/+ vs. -/-	-0.2695	-0.9933 to 0.4543	No	ns	0.6078
+/- vs. -/-	-0.3121	-1.036 to 0.4117	No	ns	0.517
Replicate Values: Individual 2^(–∆∆Ct) values (average from technical triplicates) normalized to the average value for +/+ samples
T
+/+	+/-	-/-
1.14944	0.960407	1.75599
1.39777	1.5442	1.34936
0.87412	0.662942	0.800056
1.07985	0.839146	1.22834
0.872547	0.729865	0.938139
0.626273	0.491337	1.17098
EOMES
+/+	+/-	-/-
0.862001	0.623384	0.599775
1.04441	0.722035	0.888702
1.27375	1.15599	1.10933
0.962901	0.903879	0.820967
1.0756	1.10483	0.917088
0.781338	0.591343	0.622541
MESP1
+/+	+/-	-/-
1.05748	0.792194	1.01448
1.09041	0.74737	0.76841
1.1206	0.960512	0.986126
0.702546	0.608324	0.762006
1.09864	0.982467	0.970575
0.930325	0.713523	1.40326
MESP2
+/+	+/-	-/-
1.07115	0.770928	0.853112
0.967296	0.47303	0.705763
1.26127	1.72222	2.45533
0.942714	0.798128	0.694708
1.00701	1.28585	1.48222
0.750564	0.694562	1.42607
