# Supplementary material for: GATA6 regulates WNT and BMP programs to pattern precardiac mesoderm during the earliest stages of human cardiogenesis
Source: eLife. 2025 Mar 13;13:RP100797. doi: 10.7554/eLife.100797 (PMC11906159; doi:10.7554/eLife.100797)
Supplement: Figure 6—figure supplement 1—source data 1. [file elife-100797-fig6-figsupp1-data1.xlsx]

## Sheet: Sheet1
Figure 6-figure supplement 1 - Source Data 1
Figure 6-figure supplement 1A,B: RT-qPCR.
Figure 6-figure supplement 1A: Left (RT-qPCR time course)
Numbers indicate individual 2^(–∆∆Ct) values (average from technical triplicates) normalized to +/+ D2 samples.
LGR5
	+/+ w4	+/- m2	-/- m11
D0	0.00976	0.00675	0.00604
D2	1	0.361	0.0854
D3	1.515	0.5435	0.1038
D4	1.787	1.338	0.0896
D5	2.474	0.8594	0.0271
D6	1.063	1.615	0.0386
D8	0.0685	0.201	0.00764
D11	0.0403	0.0298	0.00303
Figure 6-figure supplement 1A: Right graph
GraphPad Prism 10 Summary Statistics: one-way ANOVA with Tukey's multiple comparisons test
Tukey's multiple comparisons test	Mean Diff.	95.00% CI of diff.	Below threshold?	Summary	Adjusted P Value
+/+ vs. +/-	0.5109	0.09299 to 0.9288	Yes	*	0.0173
+/+ vs. -/-	0.7506	0.3326 to 1.168	Yes	**	0.0012
+/- vs. -/-	0.2397	-0.1783 to 0.6576	No	ns	0.3123
Figure 6-figure supplement 1A: Right graph. Replicate Values: Individual 2^(–∆∆Ct) values (average from technical triplicates) normalized to the average value for +/+ samples
+/+	+/-	-/-
0.733454	0.28313	0.0936228
0.853309	0.191241	0.185738
0.412031	0.299789	0.162671
1.38851	0.749284	0.12679
1.09076	0.400121	0.15649
Figure 6-figure supplement 1B
Numbers indicate individual 2^(–∆∆Ct) values (average from technical triplicates) normalized to +/+ sample.
+/+	-/-	-/- EV	-/- LGR5	-/- LGR5 30	-/- LGR5 125	-/- LGR5 250	-/- LGR5 500
1	0.0501	0.0323276	0.14278	0.139547	0.488281	0.678341	1.83459
