# Supplementary material for: GATA6 regulates WNT and BMP programs to pattern precardiac mesoderm during the earliest stages of human cardiogenesis
Source: eLife. 2025 Mar 13;13:RP100797. doi: 10.7554/eLife.100797 (PMC11906159; doi:10.7554/eLife.100797)
Supplement: Figure 6—figure supplement 1—source data 2. [file elife-100797-fig6-figsupp1-data2.xlsx]

## Sheet: Flow cytometry
Figure 6-figure supplement 1 - Source Data 2
Figure 6-figure supplement 1C, D: flow cytometry
K= KDR, P = PDGFRa
Figure 6-figure supplement 1C statistics
GraphPad Prism 10 Summary statistics: two-tailed T-test
KO -/-
Column B	CHIR
vs.	vs.
Column A	DMSO
Unpaired t test
P value	0.0669
P value summary	ns
Significantly different (P < 0.05)?	No
One- or two-tailed P value?	Two-tailed
t, df	t=1.976, df=15
How big is the difference?
Mean of column A	0.09125
Mean of column B	3.373
Difference between means (B - A) ± SEM	3.282 ± 1.661
95% confidence interval	-0.2589 to 6.822
R squared (eta squared)	0.2065
Figure 6-figure supplement 1C Replicates: each number indicates %cTnT from an individual experiment.
KO -/-
DMSO	CHIR
0.117	2.749
0.272	0.165
0.034	0.194
0.033	1.656
0.15	0.13
0.042	0.689
0.071	4.83
0.011	14.693
	5.25
Figure 6-figure supplement 1D statistics
GraphPad Prism 10 Summary statistics: Tukey's Multiple comparisons test				one-way ANOVA
Tukey's multiple comparisons test	Mean Diff.	95.00% CI of diff.	Below threshold?	Summary	Adjusted P Value
+/+ DMSO vs. -/- DMSO	38.35	18.61 to 58.08	Yes	***	0.0003
+/+ DMSO vs. -/- CHIR	26.71	-0.6808 to 54.10	No	ns	0.0567
-/- DMSO vs. -/- CHIR	-11.64	-39.81 to 16.53	No	ns	0.5535
Figure 6-figure supplement 1D Replicates: each number indicates %K+P+ from an individual experiment.
+/+ DMSO	-/- DMSO	-/- CHIR
82.9	9.6	48.2
44	4.2	31.5
48.7	13.1	33.7
47	38
41.9	28.9
87.1	30.5
77.2	44.6
84.8	40.4
71.7
59.8
Figure 6B Replicates: each number indicates %K+P+, %K+, or %P+ (as indicated) from an individual experiment
K+P+			K+			P+
+/+ EV	-/- EV	-/- iLGR5	+/+ EV	-/- EV	-/- iLGR5	+/+ EV	-/- EV	-/- iLGR5
74.7	7.8	23.2	86.3	22.5	47.1	91.6	66.9	60.1
41.3	24	45.7	49.5	47.4	59.2	88.4	50.2	82.4
37.7	14.3	19.4	71.3	40.2	51.2	92.3	86.6	78.3
56.05	27.985	33.655	68.675	39.175	49.2	86.07	82.65	76.95
39.3	10.5	28.3	53.4	26.7	66.9	90	89.3	89
54.9	15.1	19.7	58.6	19.2	28.3	90.8	79	70.8
Figure 6D Replicates: each number indicates %K+P+, %K+, or %P+ (as indicated) from an individual experiment
K+P+	DMSO										CHIR LB
+/+	41.9	47	87.1	84.8	71.7	30.5	77.2	59.8	79.1	83.3				69	66.5	53.3	32.2	51
-/-	4.2	9.6	13.1	28.9	30.5	40.4	38	44.6			28.9	34.3	54.7	56	60.3	58.3	64.3	75.5
K+	DMSO										CHIR LB
+/+	72.9	79.9	86.7	89.6	76.3	23.8	77.5	54.6	76.4	93.9				79.1	72.8	62	60.1	72.5
-/-	12.6	24.2	11.6	37	38.1	42.8	31.8	41.7			67.1	63.8	64.4	69.2	68.8	63.1	82.3	87.9
P+	DMSO										CHIR LB
+/+	69.8	57.1	96	94.4	95.1	93.9	88.2	89.6	97.2	92.7				74.4	72.5	53.8	31.2	49.9
-/-	64.2	67.5	94.4	90.4	92	76.8	84.9	84			52.3	64.6	74.5	83.2	92.1	69.9	64.6	77.8
