# Supplementary material for: GATA6 regulates WNT and BMP programs to pattern precardiac mesoderm during the earliest stages of human cardiogenesis
Source: eLife. 2025 Mar 13;13:RP100797. doi: 10.7554/eLife.100797 (PMC11906159; doi:10.7554/eLife.100797)
Supplement: Figure 6—source data 1. — First tab includes KP flow cytometry in panels B and D. Second tab includes cTnT flow cytometry in panels C and E. [file elife-100797-fig6-data1.xlsx]

## Sheet: Figure 6B 6D  KP flow
Figure 6 - Source Data 1
Figure 6B, D: KDR / PDGFRa flow cytometry
K= KDR, P = PDGFRa
Figure 6B statistics
GraphPad Prism 10 Summary statistics: Tukey's Multiple comparisons test				one-way ANOVA
K+P+ double positive
Tukey's multiple comparisons test	Mean Diff.	95.00% CI of diff.	Below threshold?	Summary	Adjusted P Value
+/+ EV vs. -/- EV	34.04	10.51 to 57.58	Yes	*	0.0122
+/+ EV vs. -/- iLGR5	22.33	-3.396 to 48.06	No	ns	0.0801
-/- EV vs. -/- iLGR5	-11.71	-21.67 to -1.749	Yes	*	0.0277
K+
Tukey's multiple comparisons test	Mean Diff.	95.00% CI of diff.	Below threshold?	Summary	Adjusted P Value
+/+ EV vs. -/- EV	32.1	5.564 to 58.64	Yes	*	0.0249
+/+ EV vs. -/- iLGR5	14.31	-14.09 to 42.71	No	ns	0.3136
-/- EV vs. -/- iLGR5	-17.79	-34.23 to -1.341	Yes	*	0.0378
P+
Tukey's multiple comparisons test	Mean Diff.	95.00% CI of diff.	Below threshold?	Summary	Adjusted P Value
+/+ EV vs. -/- EV	14.09	-5.279 to 33.45	No	ns	0.1352
+/+ EV vs. -/- iLGR5	13.6	-0.9258 to 28.13	No	ns	0.0626
-/- EV vs. -/- iLGR5	-0.4833	-21.49 to 20.52	No	ns	0.9969
Figure 6D statistics
GraphPad Prism 10 Summary statistics: Tukey's Multiple comparisons test				2-way ANOVA
K+P+ double positive
Tukey's multiple comparisons test	Predicted (LS) mean diff.	95.00% CI of diff.	Below threshold?	Summary	Adjusted P Value
+/+:DMSO vs. +/+:CHIR LB	11.84	-13.67 to 37.35	No	ns	0.589
+/+:DMSO vs. -/-:DMSO	40.08	17.99 to 62.17	Yes	***	0.0002
+/+:DMSO vs. -/-:CHIR LB	12.2	-9.886 to 34.29	No	ns	0.4446
+/+:CHIR LB vs. -/-:DMSO	28.24	1.691 to 54.78	Yes	*	0.0339
+/+:CHIR LB vs. -/-:CHIR LB	0.3625	-26.18 to 26.91	No	ns	>0.9999
-/-:DMSO vs. -/-:CHIR LB	-27.88	-51.16 to -4.592	Yes	*	0.0144
K+
Tukey's multiple comparisons test	Predicted (LS) mean diff.	95.00% CI of diff.	Below threshold?	Summary	Adjusted P Value
+/+:DMSO vs. +/+:CHIR LB	3.86	-17.91 to 25.63	No	ns	0.9617
+/+:DMSO vs. -/-:DMSO	43.19	24.34 to 62.03	Yes	****	<0.0001
+/+:DMSO vs. -/-:CHIR LB	2.335	-16.51 to 21.18	No	ns	0.9863
+/+:CHIR LB vs. -/-:DMSO	39.33	16.67 to 61.98	Yes	***	0.0003
+/+:CHIR LB vs. -/-:CHIR LB	-1.525	-24.18 to 21.13	No	ns	0.9977
-/-:DMSO vs. -/-:CHIR LB	-40.85	-60.72 to -20.98	Yes	****	<0.0001
P+
Tukey's multiple comparisons test	Predicted (LS) mean diff.	95.00% CI of diff.	Below threshold?	Summary	Adjusted P Value
+/+:DMSO vs. +/+:CHIR LB	31.04	11.03 to 51.05	Yes	**	0.0012
+/+:DMSO vs. -/-:DMSO	5.625	-11.70 to 22.95	No	ns	0.8108
+/+:DMSO vs. -/-:CHIR LB	15.03	-2.300 to 32.35	No	ns	0.1067
+/+:CHIR LB vs. -/-:DMSO	-25.42	-46.24 to -4.592	Yes	*	0.0124
+/+:CHIR LB vs. -/-:CHIR LB	-16.02	-36.84 to 4.808	No	ns	0.1772
-/-:DMSO vs. -/-:CHIR LB	9.4	-8.863 to 27.66	No	ns	0.5051
Figure 6B Replicates: each number indicates %K+P+, %K+, or %P+ (as indicated) from an individual experiment
K+P+			K+			P+
+/+ EV	-/- EV	-/- iLGR5	+/+ EV	-/- EV	-/- iLGR5	+/+ EV	-/- EV	-/- iLGR5
74.7	7.8	23.2	86.3	22.5	47.1	91.6	66.9	60.1
41.3	24	45.7	49.5	47.4	59.2	88.4	50.2	82.4
37.7	14.3	19.4	71.3	40.2	51.2	92.3	86.6	78.3
56.05	27.985	33.655	68.675	39.175	49.2	86.07	82.65	76.95
39.3	10.5	28.3	53.4	26.7	66.9	90	89.3	89
54.9	15.1	19.7	58.6	19.2	28.3	90.8	79	70.8
Figure 6D Replicates: each number indicates %K+P+, %K+, or %P+ (as indicated) from an individual experiment
K+P+	DMSO										CHIR LB
+/+	41.9	47	87.1	84.8	71.7	30.5	77.2	59.8	79.1	83.3				69	66.5	53.3	32.2	51
-/-	4.2	9.6	13.1	28.9	30.5	40.4	38	44.6			28.9	34.3	54.7	56	60.3	58.3	64.3	75.5
K+	DMSO										CHIR LB
+/+	72.9	79.9	86.7	89.6	76.3	23.8	77.5	54.6	76.4	93.9				79.1	72.8	62	60.1	72.5
-/-	12.6	24.2	11.6	37	38.1	42.8	31.8	41.7			67.1	63.8	64.4	69.2	68.8	63.1	82.3	87.9
P+	DMSO										CHIR LB
+/+	69.8	57.1	96	94.4	95.1	93.9	88.2	89.6	97.2	92.7				74.4	72.5	53.8	31.2	49.9
-/-	64.2	67.5	94.4	90.4	92	76.8	84.9	84			52.3	64.6	74.5	83.2	92.1	69.9	64.6	77.8

## Sheet: Figure 6C 6E cTnT flow
Figure 6 - Source Data 1
Figure 6C, E: cTnT flow cytometry
Figure 6C statistics
GraphPad Prism 10 Summary statistics: two-tailed T-test
WT +/+
Column B	CHIR LB
vs.	vs.
Column A	DMSO
Unpaired t test
P value	0.0341
P value summary	*
Significantly different (P < 0.05)?	Yes
One- or two-tailed P value?	Two-tailed
t, df	t=2.390, df=12
How big is the difference?
Mean of column A	62.92
Mean of column B	42.85
Difference between means (B - A) ± SEM	-20.07 ± 8.396
95% confidence interval	-38.36 to -1.775
R squared (eta squared)	0.3225
KO -/-
Column B	CHIR LB
vs.	vs.
Column A	DMSO
Unpaired t test
P value	0.0089
P value summary	**
Significantly different (P < 0.05)?	Yes
One- or two-tailed P value?	Two-tailed
t, df	t=3.172, df=11
How big is the difference?
Mean of column A	0.1535
Mean of column B	3.939
Difference between means (B - A) ± SEM	3.785 ± 1.193
95% confidence interval	1.159 to 6.412
R squared (eta squared)	0.4777
Figure 6E statistics
GraphPad Prism 10 Summary statistics: Tukey's Multiple comparisons test				2-way ANOVA
Tukey's multiple comparisons test	Predicted (LS) mean diff.	95.00% CI of diff.	Below threshold?	Summary	Adjusted P Value
+/+:DMSO vs. +/+:CHIR	34.41	14.74 to 54.09	Yes	***	0.0003
+/+:DMSO vs. +/-:DMSO	37.33	18.28 to 56.38	Yes	****	<0.0001
+/+:DMSO vs. +/-:CHIR	12.63	-5.921 to 31.18	No	ns	0.2673
+/+:CHIR vs. +/-:DMSO	2.914	-16.14 to 21.96	No	ns	0.9748
+/+:CHIR vs. +/-:CHIR	-21.78	-40.33 to -3.236	Yes	*	0.0168
+/-:DMSO vs. +/-:CHIR	-24.7	-42.58 to -6.814	Yes	**	0.0041
Figure 6C Replicates: each number indicates %cTnT+ from an individual experiment
WT +/+		KO -/-
DMSO	CHIR LB	DMSO	CHIR LB
71.611	30.411	0.229	2.545
58.261	63.349	0.349	1.117
81.683	53.483	0.234	2.642
58.373	24.164	0.034	2.253
40.686		0.033	2.798
63.902		0.042	8.235
62.153			7.98
78.724
63.665
50.139
Figure 6E Replicates: each number indicates %cTnT+ from an individual experiment
	DMSO								CHIR
+/+	40.686	63.902	62.153	78.724	63.665	58.373	50.139		37.914	21.312	10.732	20.555	13.355	21.816	51.07
+/-	34.924	29.563	23.856	4.335	31.246	32.501	13.025	9.242	45.179	26.261	30.237	54.964	47.93	30.151	61.596	64.432	62.565
